# Supplementary material
Source: publisher figshare collection journal article supplement (https://acs.figshare.com/ndownloader/files/4619668)
Supplement: Supplementary file 1 [file 4619668]

# Supporting information

## ***In-Situ* Assembly of Cu<sub>x</sub>S Quantum-Dot into Thin Film: A Highly-Conductive P-Type Transparent Film**

Sheng-Cong Liufu, Li-Dong Chen, Qin Yao and Fu-Qiang Huang

State Key Laboratory of High Performance Ceramics and Superfine Microstructure,  
Shanghai Institute of Ceramics, Chinese Academy of Sciences, 1295 Dingxi Road,  
Shanghai, 200050, P. R. China.

### **Experimental details**

#### Synthesis of Cu<sub>x</sub>S QD film

Cu<sub>x</sub>S QD thin films on quartz-glass and flexible PE substrates were synthesized in an aqueous solution at room temperature. Typically, 0.316 g CuCl<sub>2</sub>·2H<sub>2</sub>O was dissolved in a mixed solution of 50 ml of water and 3 ml of NH<sub>4</sub>OH, and then 1.5 ml of triethanolamine (TEA) and 15 ml of 0.1 M thiourea (Tu) were added with stirring, respectively. Quartz-glass is surface-functionalized by self-assembled monolayers (SAMs) of 3-(trimethoxysilyl) propylamine (TMOSPA, Alfa Aesar, 96%), which were prepared by immersing the substrate into a 50:50 (v/v) solution of ethanol/water with 100 mM TMOSPA for 8 h. Surface of PE plastic substrate was modified by fumed sulfuric acid to form sulfonic groups. The surface-modified substrates were subsequently immersed into the aqueous precursor solution for 6 h at room temperature (~25 °C). Cu<sub>x</sub>S film was formed based on the nucleation and growth of

cooper sulfide solid phases. The obtained film was carefully rinsed with deionized water and dried naturally.

### Characterization

The elemental composition of the as-prepared  $\text{Cu}_x\text{S}$  thin film was determined by X-ray photoelectron spectroscopy (XPS) using nonmonochromatic Mg  $K\alpha$  X-rays as the excitation source and C1s as reference line. Morphologies of surface and cross-section of the  $\text{Cu}_x\text{S}$  film were characterized by field-emission scanning electron microscopy (FESEM; JSM 6700F, JEOL). High-resolution transmission electron microscope (HRTEM; JEM-2100F, JEOL) was used to determine the detailed crystalline structures. Optical transmittance study was carried out using a UV-Vis spectrometer in the wavelength range of 380~1100 nm. The Seebeck coefficient was calculated from the slope of the linear relation between  $\Delta V$  and  $\Delta T$ , where  $\Delta V$  is the thermoelectromotive force and  $\Delta T$  is the difference in temperature, measured by two Pt/Pt-Rh thermocouple attached to both ends of the surface of the prepared films.  $\Delta T$  was built by heating one end using a film heater to generate temperature gradients. Dark electrical resistivity, carrier concentration and Hall mobility were measured by the dc four-point probe method in the van der Pauw configuration using a Hall measurement system (ACCENT HL5500).
